# Supplementary material for: Transformation of animal utilization strategies from the late Neolithic to the Han Dynasty in the Hexi Corridor, northwest China: Zooarchaeological and stable isotopic evidence
Source: Frontiers journal article supplement (doi:10.3389/feart.2022.1064803), 2023-01-17
Supplement: Table_1.DOCX [file Table_1.DOCX]

**Table S1 Isotopic composition and quality indicators of animal samples.**

| **Sample no.** | **Species** | **Dynasty** | **Phase** | **Skeletal element** | **Col wt.%** | **C wt.%** | **N wt.%** | **C: N** | **δ13C ‰** | **δ15N ‰** |
| --- | --- | --- | --- | --- | --- | --- | --- | --- | --- | --- |
| 2018ZHM16 | *Gallus gallus* | The later period of the mid Western Han Dynasty | 1 | R. Humerus | 8.3 | 43.4 | 16.1 | 3.2 | -14.4 | 8.1 |
| 2018ZHM23 | *Gallus gallus* | The later period of the mid Western Han Dynasty | 1 | R. Femur | 6.7 | 43.2 | 15.9 | 3.2 | -19.3 | 7.7 |
| 2018ZHM23 | *Sus domestica* | The later period of the mid Western Han Dynasty | 1 | R. Humerus | 8.2 | 43.9 | 16.2 | 3.2 | -11.9 | 8.4 |
| 2018ZHM25 | *Sus domestica* | The later period of the mid Western Han Dynasty | 1 | Phalanx Ⅰ | 9.8 | 44.4 | 16.6 | 3.1 | -15.7 | 7.6 |
| 2018ZHM55 | *Sus domestica* | The later period of the mid Western Han Dynasty | 1 | R. Femur | 7.9 | 43.6 | 15.7 | 3.2 | -13.4 | 10.0 |
| 2018ZHM55 | *Gallus gallus* | The later period of the mid Western Han Dynasty | 1 | L. Femur | 2.7 | 41.2 | 15.0 | 3.2 | -14.0 | 7.8 |
| 2018ZHM55 | *Bos domestica* | The later period of the mid Western Han Dynasty | 1 | R. Calcaneus | 7.5 | 43.8 | 16.2 | 3.2 | -19.2 | 8.5 |
| 2018ZHM57 | *Canis familiaris* | The later period of the mid Western Han Dynasty | 1 | Metatarsal | 5.8 | 43.8 | 16.0 | 3.2 | -14.1 | 9.6 |
| 2018ZHM57 | *Sus domestica* | The later period of the mid Western Han Dynasty | 1 | R. Femur | 10.3 | 44.1 | 15.9 | 3.2 | -12.8 | 7.5 |
| 2018ZHM57 | *Gallus gallus* | The later period of the mid Western Han Dynasty | 1 | L. Femur | 11.4 | 43.9 | 15.8 | 3.2 | -14.9 | 5.2 |
| 2018ZHM57 | *Gallus gallus* | The later period of the mid Western Han Dynasty | 1 | R. Tarsometatarsus | 6.9 | 45.1 | 15.8 | 3.3 | -17.4 | 5.8 |
| 2018ZHM57 | *Bos domestica* | The later period of the mid Western Han Dynasty | 1 | Rib | 3.1 | 43.5 | 16.1 | 3.1 | -19.4 | 5.6 |
| 2018ZHM57 | *Sus domestica* | The later period of the mid Western Han Dynasty | 1 | R. Radius | 11.4 | 43.8 | 15.9 | 3.2 | -15.4 | 10.0 |
| 2018ZHM6 | *Gallus gallus* | The late Western Han Dynasty | 2 | Sternum | 11.7 | 44.7 | 16.5 | 3.2 | -18.4 | 8.2 |
| 2018ZHM15 | *Gallus gallus* | The late Western Han Dynasty | 2 | L. Femur | 7.8 | 44.3 | 16.4 | 3.2 | -15.4 | 6.6 |
| 2018ZHM15 | *Gallus gallus* | The late Western Han Dynasty | 2 | L. Femur | 10.8 | 44.6 | 16.2 | 3.2 | -19.2 | 8.0 |
| 2018ZHM15 | *Sus domestica* | The late Western Han Dynasty | 2 | R. Humerus | 8.8 | 44.0 | 16.0 | 3.2 | -16.5 | 8.5 |
| 2018ZHM18 | *Gallus gallus* | The late Western Han Dynasty | 2 | R. Humerus | 7.5 | 45.1 | 16.4 | 3.2 | -18.8 | 9.1 |
| 2018ZHM19 | *Gallus gallus* | The late Western Han Dynasty | 2 | R. Tibiotarsus | 4.1 | 41.8 | 15.2 | 3.2 | -18.2 | 6.8 |
| 2018ZHM19 | *Sus domestica* | The late Western Han Dynasty | 2 | L. Femur | 7.8 | 42.7 | 15.7 | 3.2 | -14.0 | 8.7 |
| 2018ZHM28 | *Gallus gallus* | The late Western Han Dynasty | 2 | R. Tarsometatarsus | 4.7 | 43.3 | 15.2 | 3.3 | -18.2 | 13.2 |
| 2018ZHM28 | *Sus domestica* | The late Western Han Dynasty | 2 | R. Femur | 11.4 | 44.0 | 16.0 | 3.2 | -16.6 | 8.2 |
| 2018ZHM30 | *Gallus gallus* | The late Western Han Dynasty | 2 | L. Tibiotarsus | 2.7 | 42.6 | 15.8 | 3.1 | -18.2 | 9.5 |
| 2018ZHM54 | *Sus domestica* | The late Western Han Dynasty | 2 | R. Femur | 11.2 | 45.7 | 16.6 | 3.2 | -12.5 | 9.5 |
| 2018ZHM89 | *Gallus gallus* | The late Western Han Dynasty | 2 | L. Tarsometatarsus | 12.0 | 44.0 | 16.2 | 3.2 | -17.7 | 8.9 |
| 2018ZHM101 | *Gallus gallus* | The early Eastern Han Dynasty | 2 | R. Tibiotarsus | 4.1 | 42.6 | 15.5 | 3.2 | -14.1 | 7.3 |
| 2018ZHM101 | *Sus domestica* | The early Eastern Han Dynasty | 2 | L. Femur | 8.2 | 44.5 | 16.2 | 3.2 | -12.3 | 8.8 |
| 2018ZHM5 | *Gallus gallus* | Wangmang to the early Eastern Han Dynasty | 2 | L. Femur | 10.2 | 42.9 | 15.9 | 3.2 | -18.2 | 9.0 |
| 2018ZHM32 | *Ovis aries* | Wangmang to the early Eastern Han Dynasty | 2 | L. Tibia | 6.4 | 44.5 | 16.2 | 3.2 | -19.9 | 4.7 |
| 2018ZHM46 | *Gallus gallus* | Wangmang to the early Eastern Han Dynasty | 2 | L. Tibiotarsus | 10.3 | 43.7 | 16.1 | 3.2 | -17.0 | 7.4 |
| 2018ZHM58 | *Sus domestica* | Wangmang to the early Eastern Han Dynasty | 2 | R. Humerus | 8.1 | 44.1 | 16.1 | 3.2 | -13.4 | 10.2 |
| 2018ZHM115 | *Sus domestica* | Wangmang to the early Eastern Han Dynasty | 2 | R. Humerus | 6.9 | 42.1 | 15.3 | 3.2 | -14.3 | 11.2 |
| 2018ZHM14 | *Gallus gallus* | ？ |  | L. Humerus | 11.1 | 44.2 | 16.3 | 3.2 | -17.0 | 8.2 |
